# Supplementary material
Source: PubMed Central journal article supplement (PMC3163826)

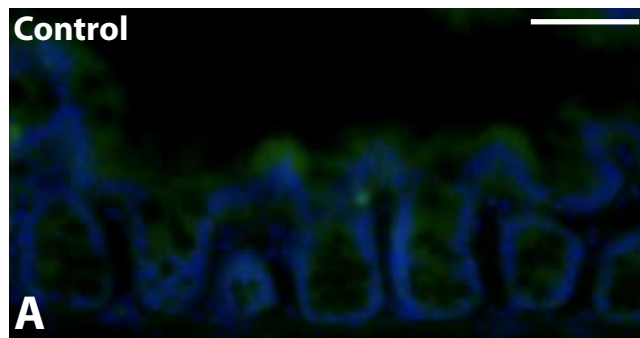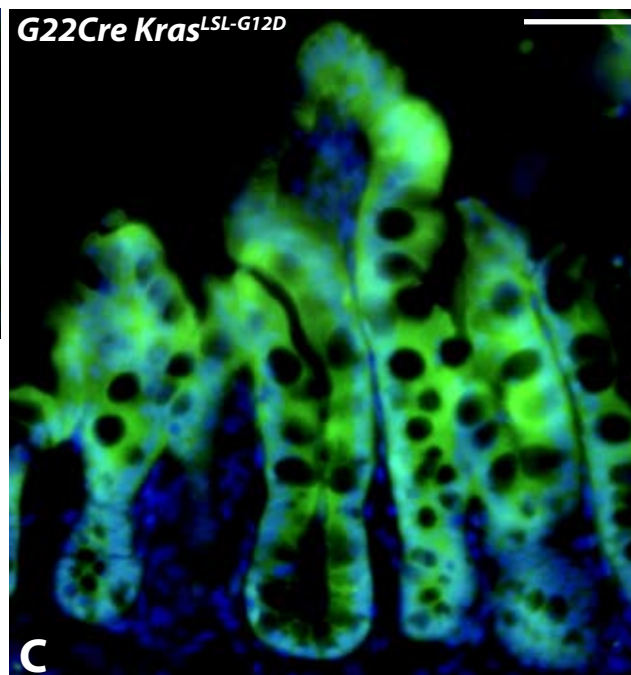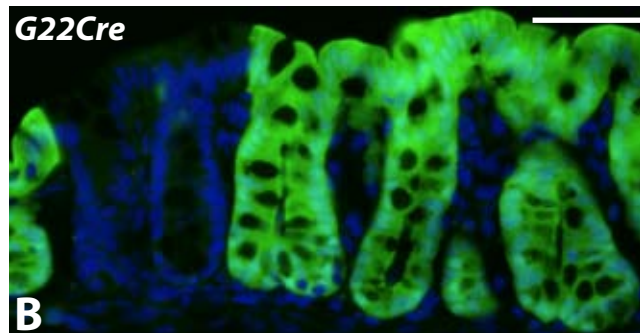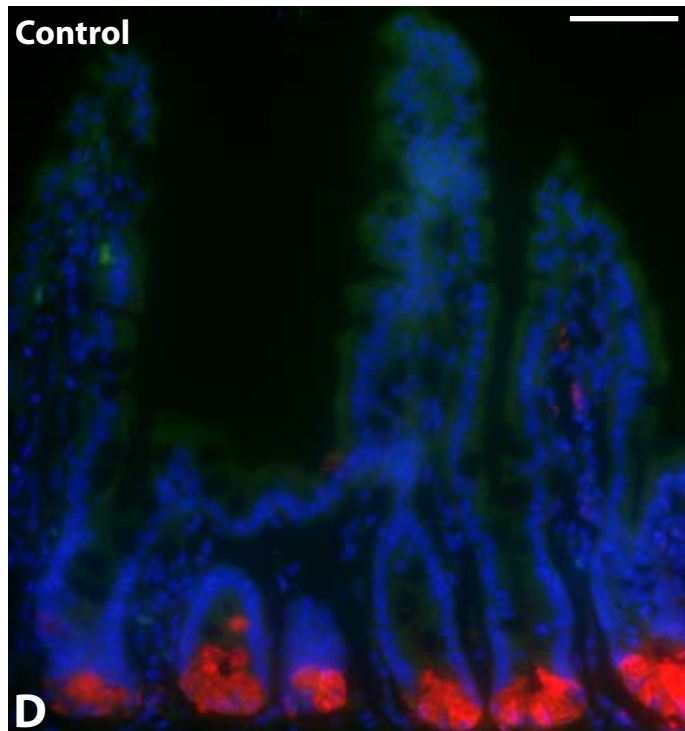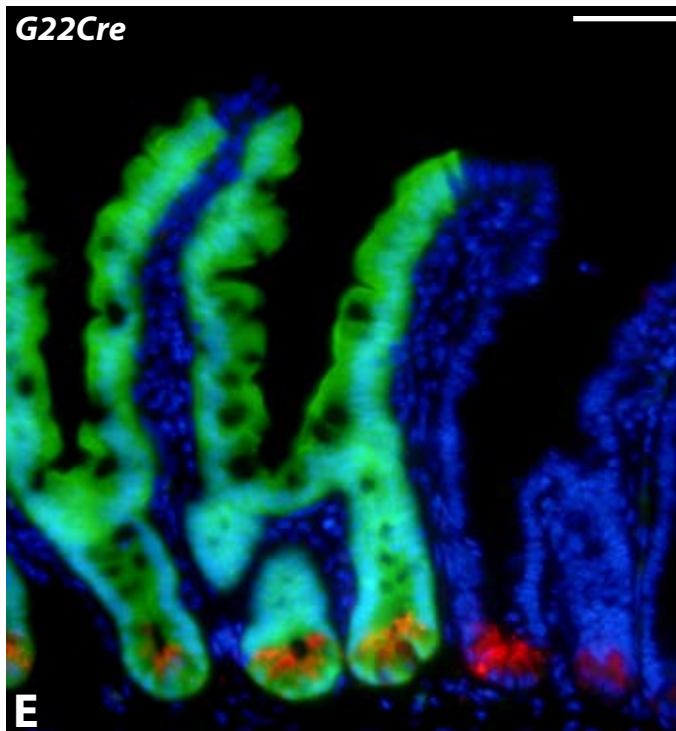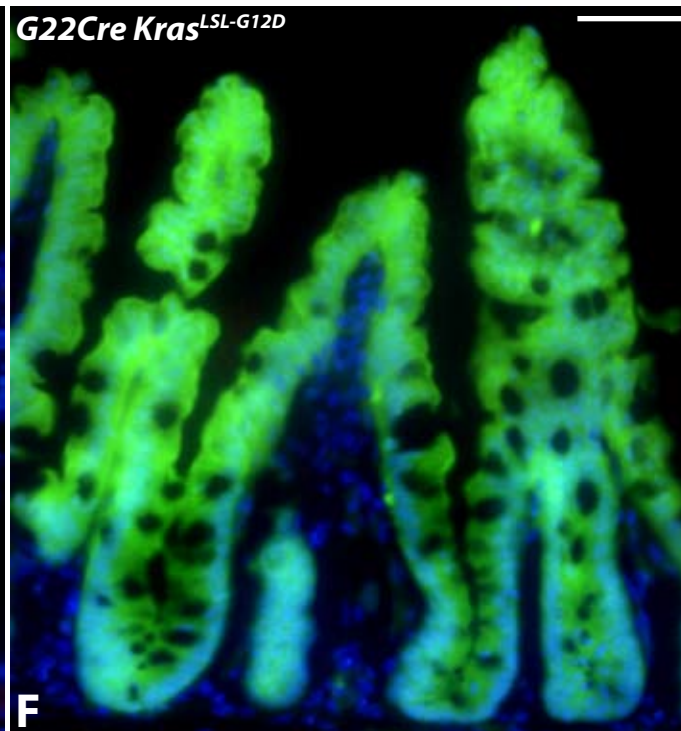

Supplement: NIHMS298138-supplement-03.pdf [file NIHMS298138-supplement-03.pdf]

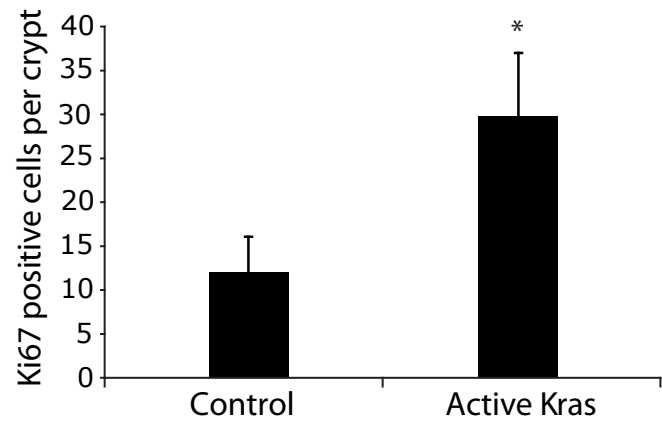

Supplement: NIHMS298138-supplement-04.pdf [file NIHMS298138-supplement-04.pdf]

A

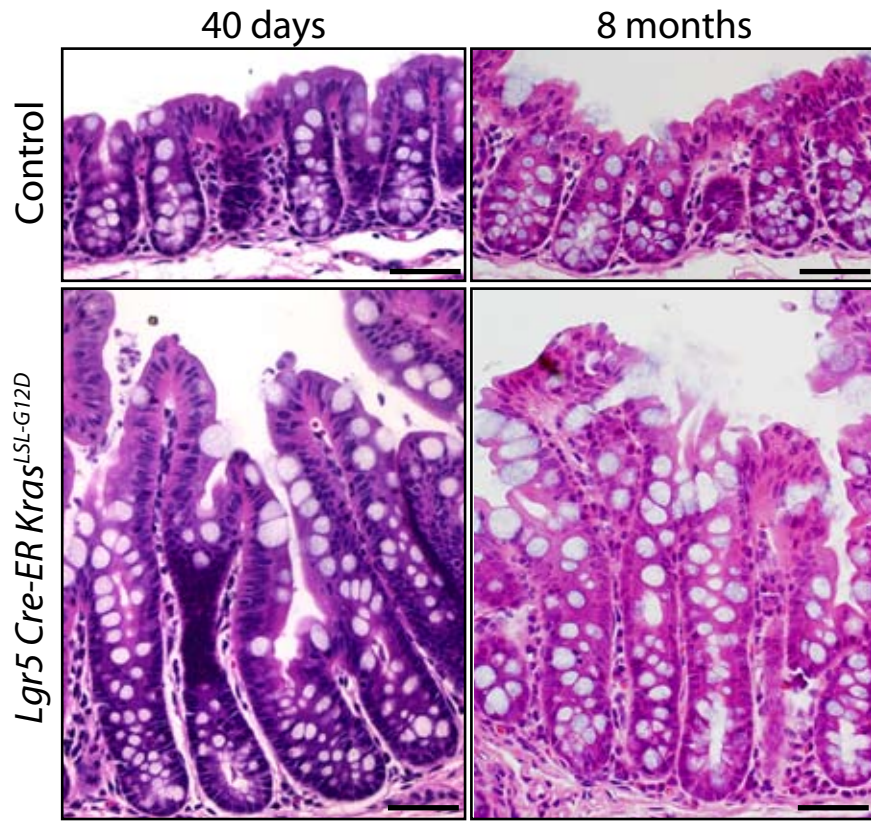

B

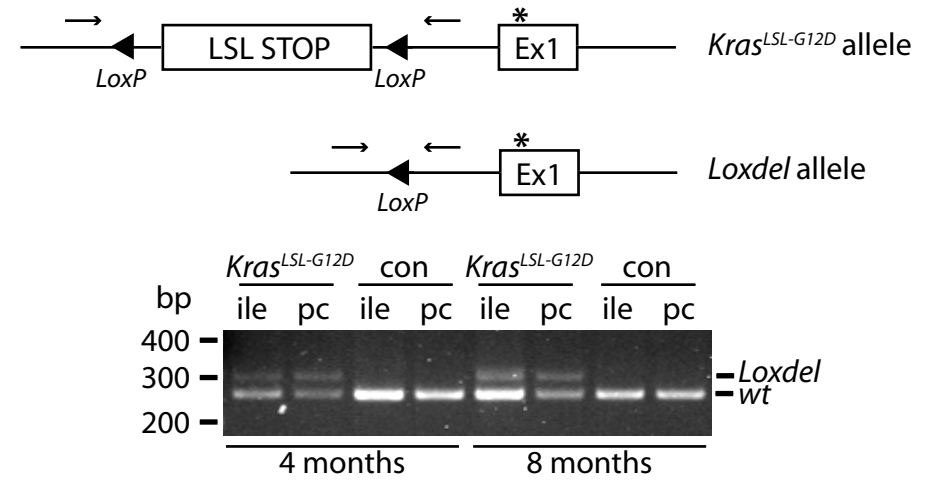

C

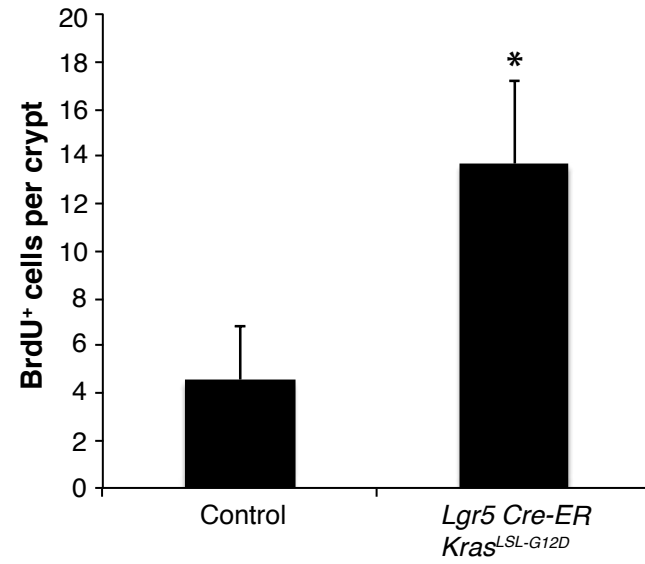

Supplement: NIHMS298138-supplement-05.pdf [file NIHMS298138-supplement-05.pdf]

A

P-MEK

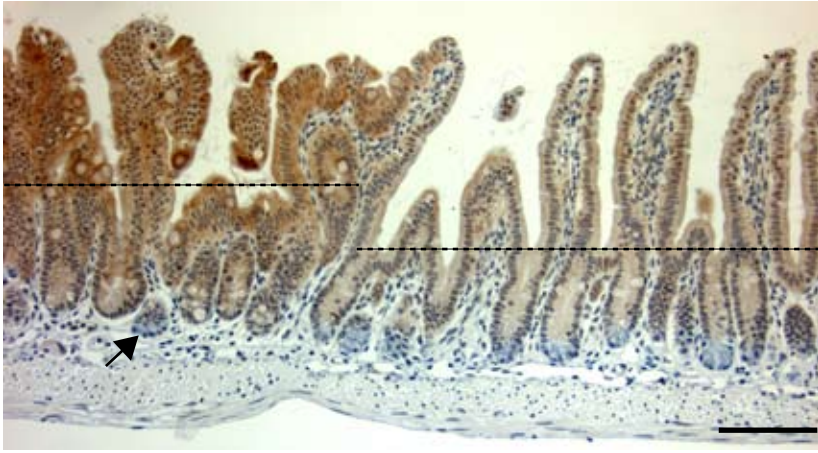

B

Lysozyme

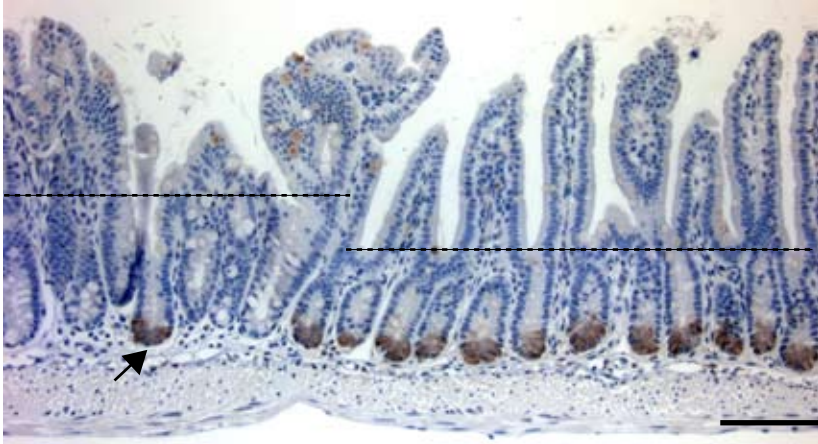

C

Alcian blue

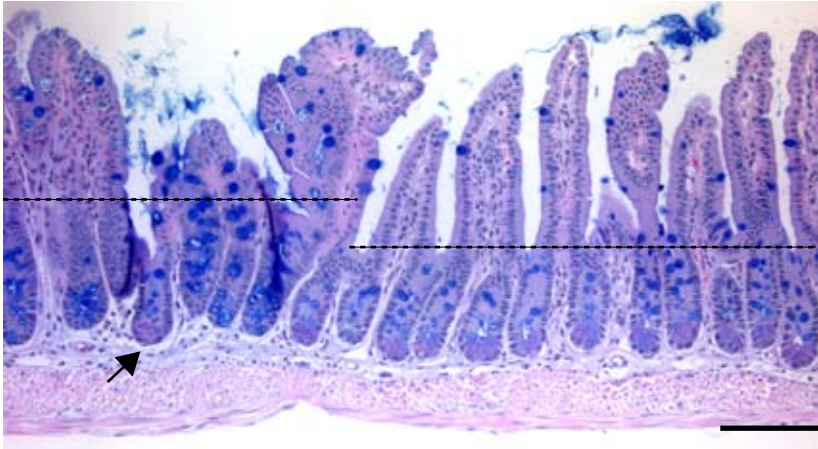

Supplement: NIHMS298138-supplement-06.pdf [file NIHMS298138-supplement-06.pdf]

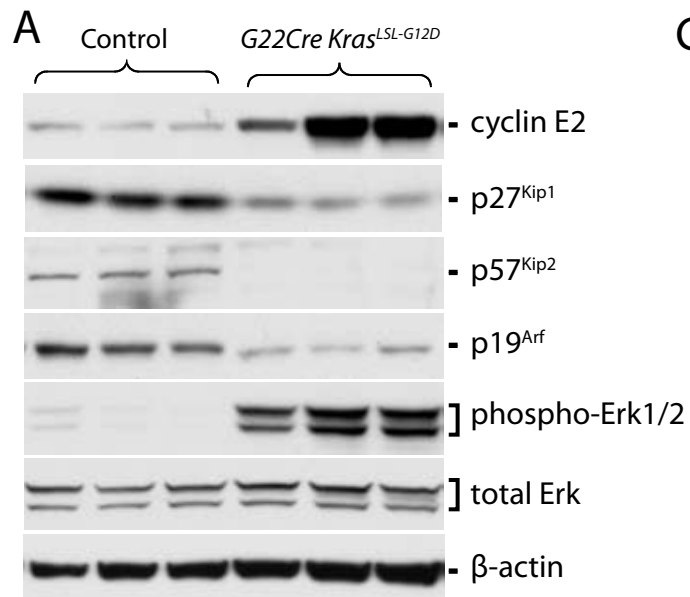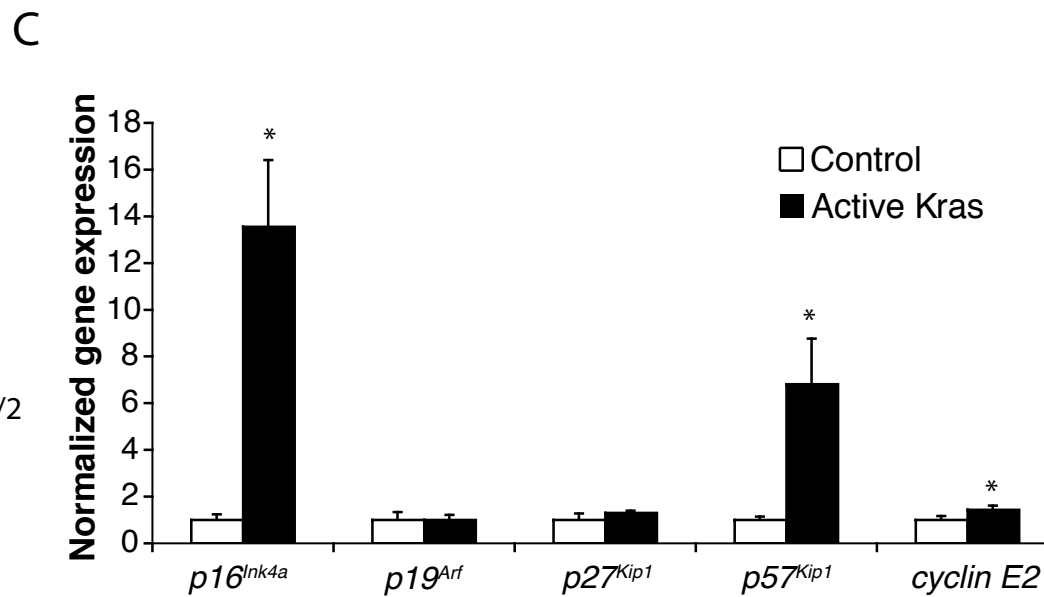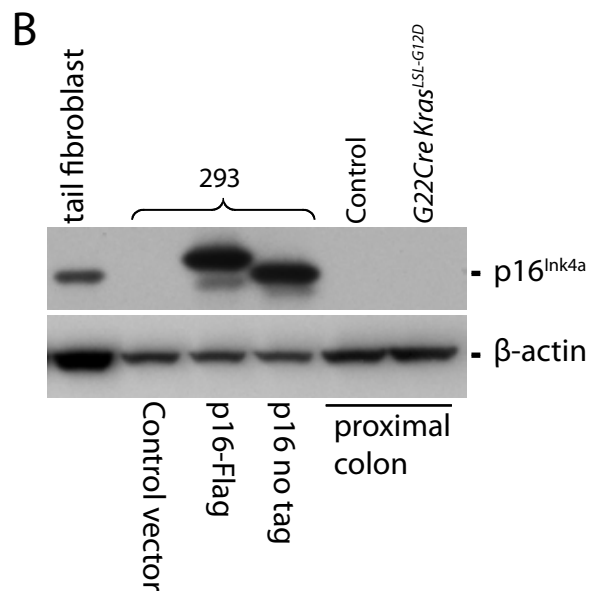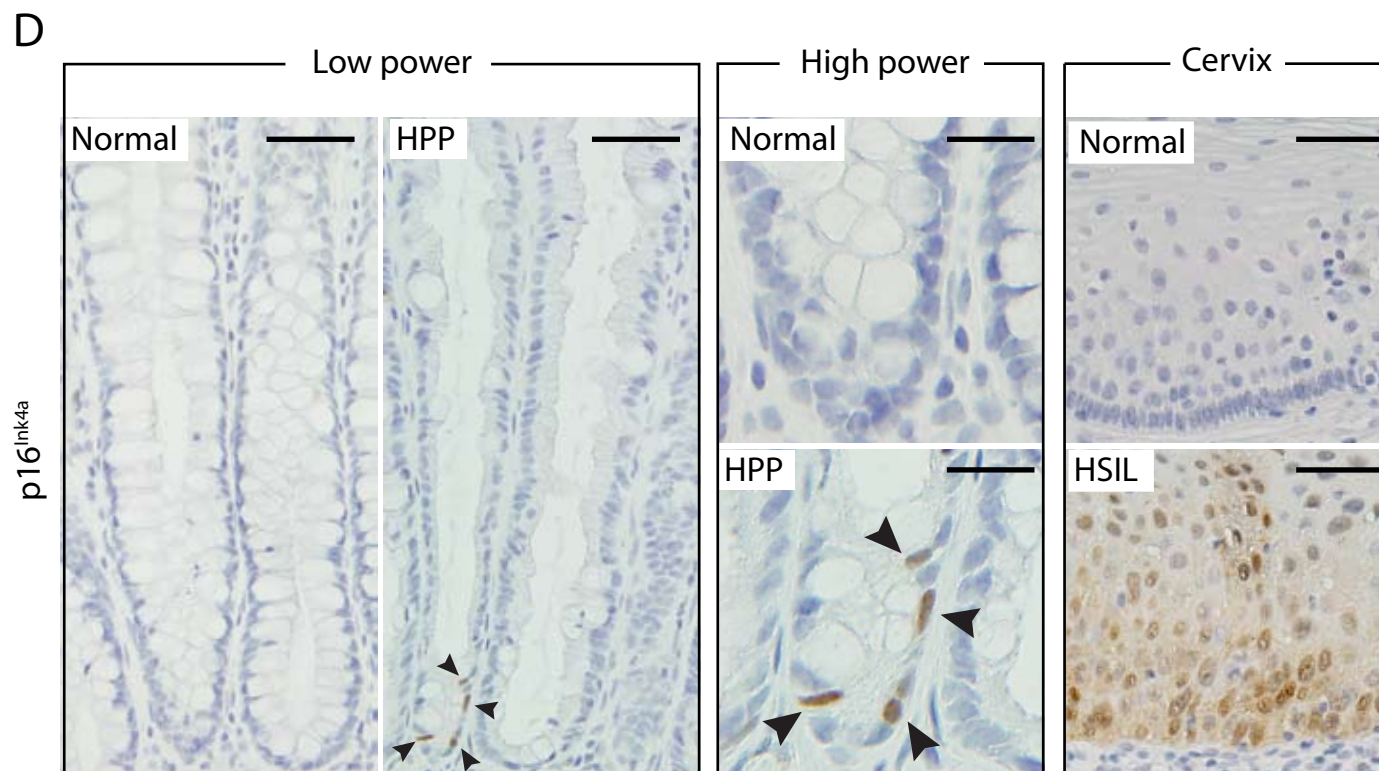

Supplement: NIHMS298138-supplement-07.pdf [file NIHMS298138-supplement-07.pdf]

A

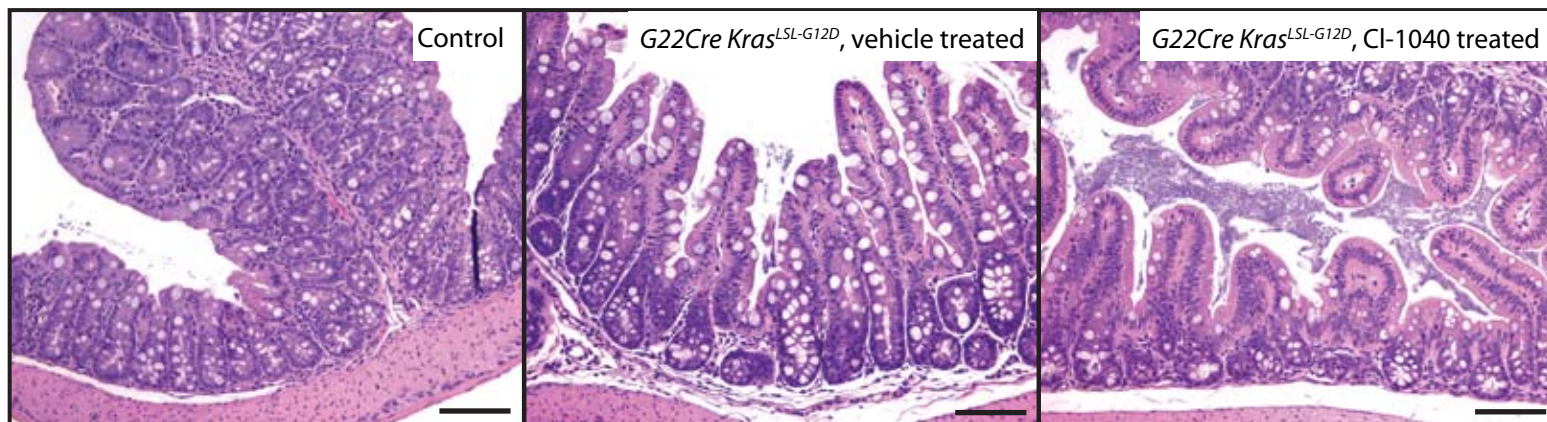

B

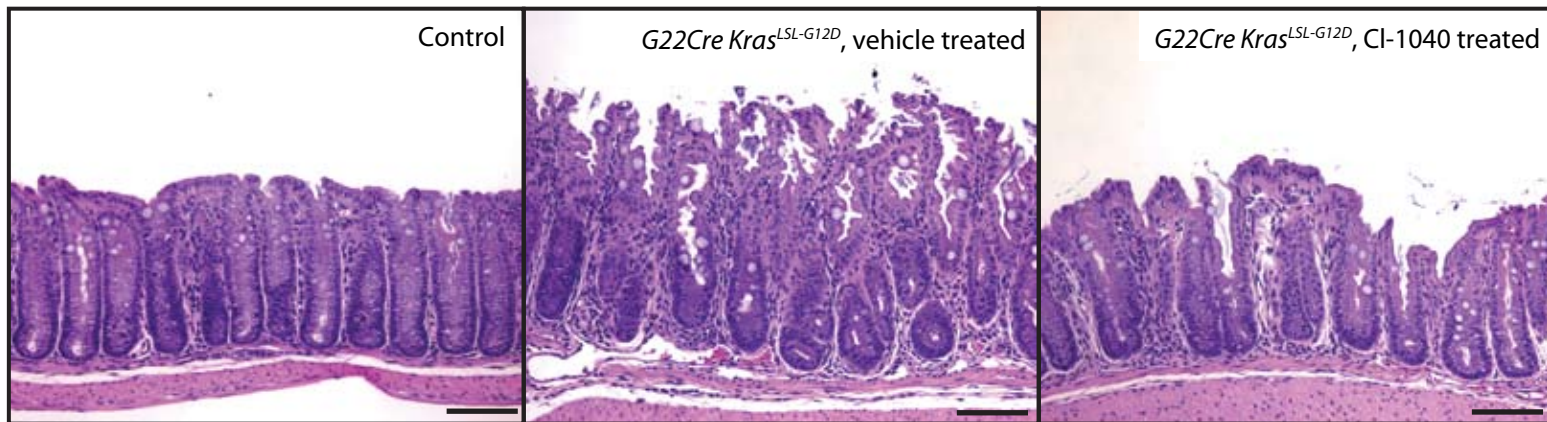

C

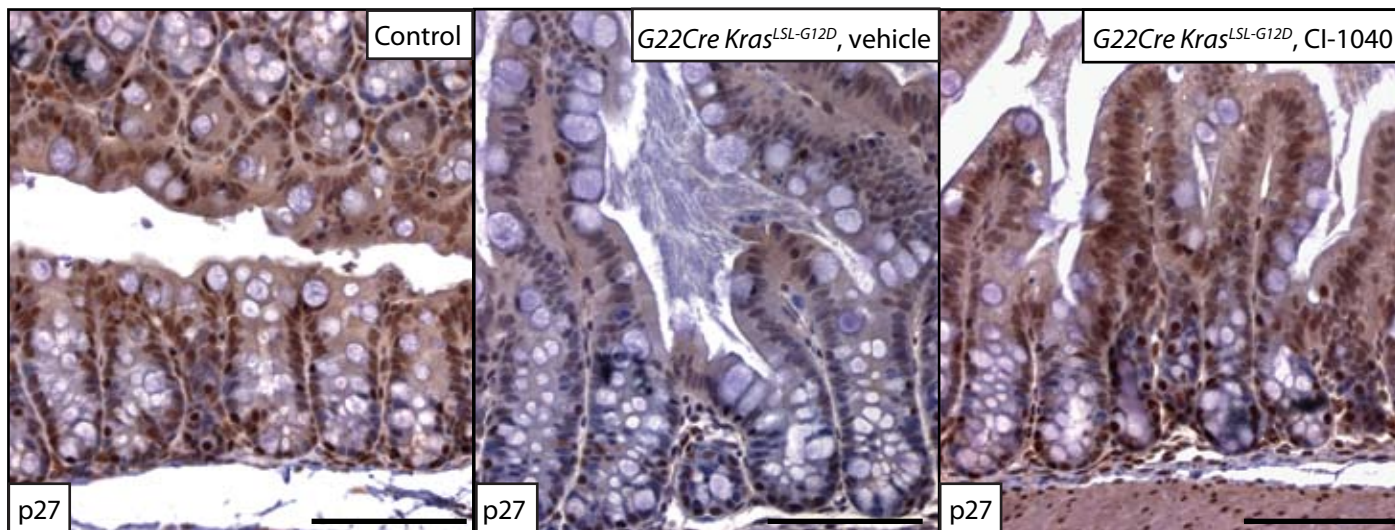

Supplement: NIHMS298138-supplement-08.pdf [file NIHMS298138-supplement-08.pdf]

**A**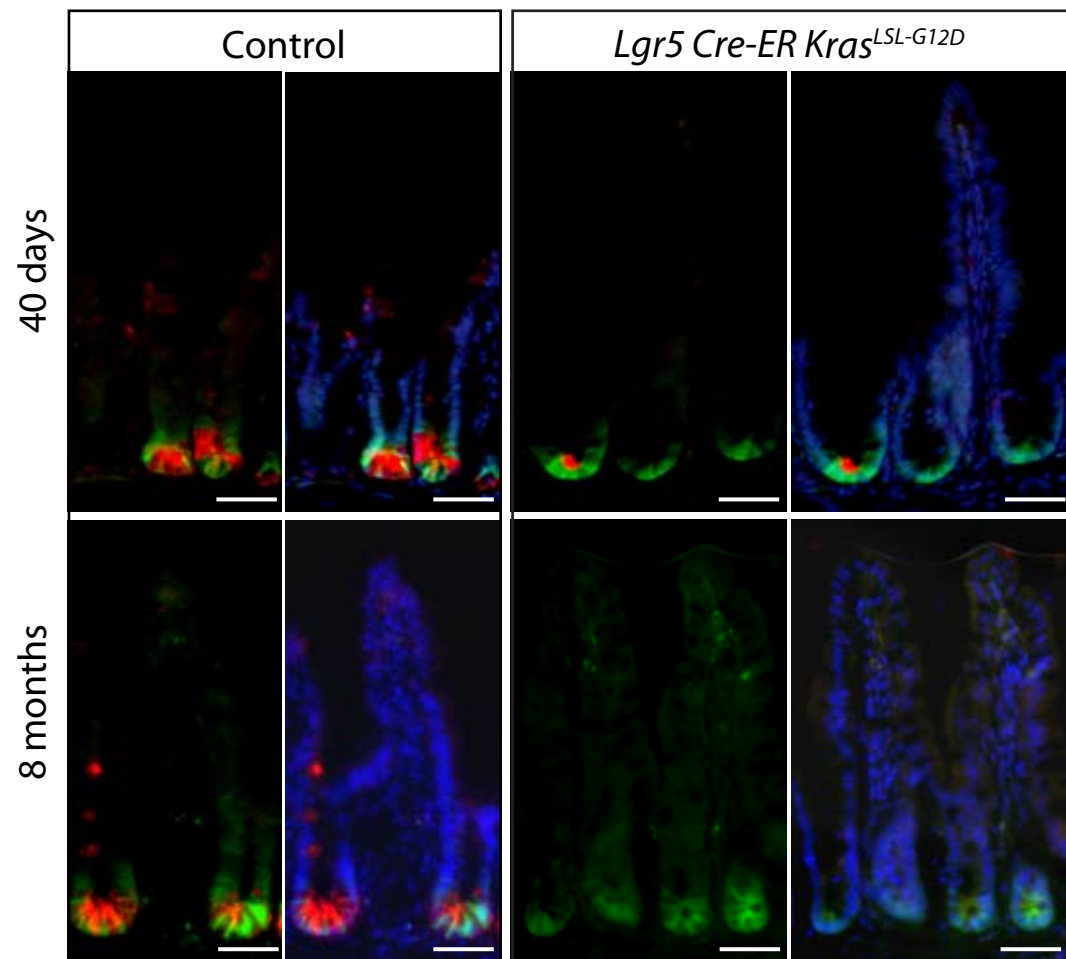**B**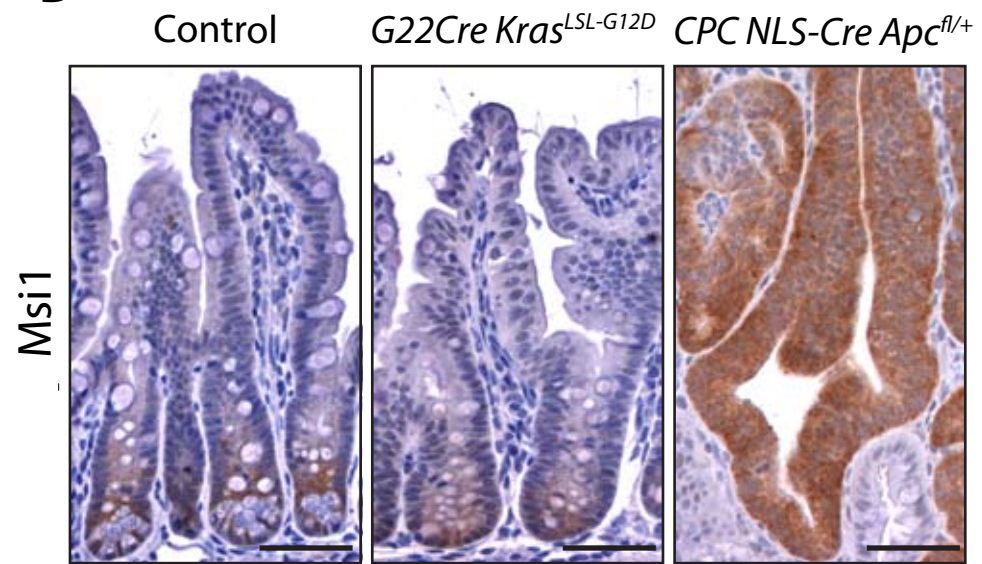

Supplement: NIHMS298138-supplement-09.pdf [file NIHMS298138-supplement-09.pdf]

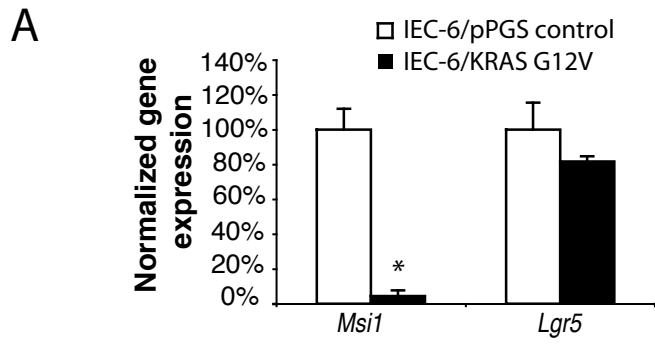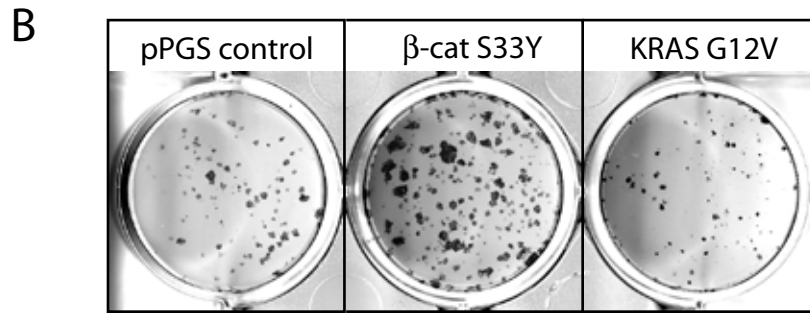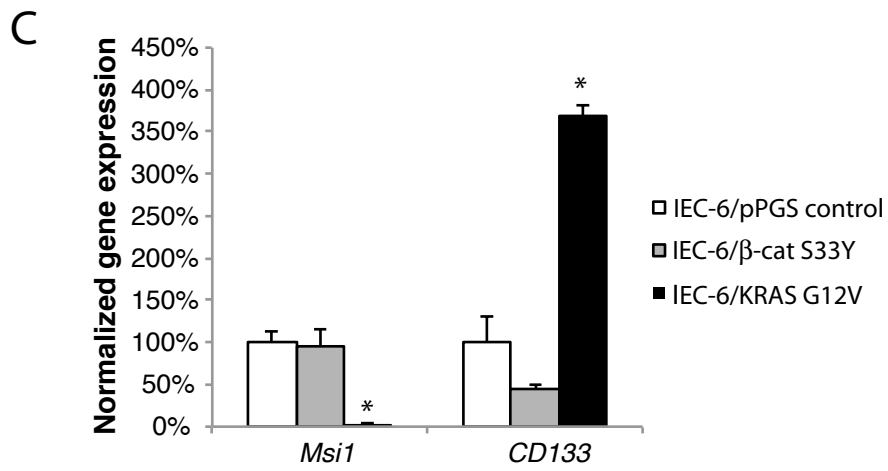

Supplement: NIHMS298138-supplement-10.pdf [file NIHMS298138-supplement-10.pdf]
